# Supplementary material for: Assembly of chainlike polyoxometalate-based lanthanide complexes in one-pot reaction system
Source: Royal Society of Chemistry journal article supplement (doi:10.1039/c3ce40686e), 2013-01-01
Supplement: c3ce40686e.pdf [file c3ce40686e.pdf]

## Supporting Information

### Assembly of chainlike polyoxometalate-based lanthanide complexes in one-pot reaction system

Xiao-Jia Feng,<sup>a</sup> Hua-Yan Han,<sup>a</sup> Yong-Hui Wang,<sup>\*a</sup> Lu-Lu Li,<sup>a</sup> Yang-Guang Li,<sup>\*a</sup> and En-Bo Wang<sup>a</sup>

#### Contents

1. Orthogonal experiments for optimizing the synthetic conditions of compounds **1-3**
2. Additional structural figures for compounds **1-3**
3. Selected bond lengths and angles for compounds **1-3**
4. Additional physical measurements for compounds **1-3**

## 1. Orthogonal experiments for optimizing the synthetic conditions of compounds

### 1-3

**Table S1a** Orthogonal experiments for optimizing the synthetic conditions of **1-3**<sup>a,b</sup>

|                                                           |                                                           |                                                           |
|-----------------------------------------------------------|-----------------------------------------------------------|-----------------------------------------------------------|
| <i>T</i> (70 °C), <i>t</i> (1.0 h), pH (1.0)              | <i>T</i> (90 °C), <i>t</i> (1.5 h), pH (1.0)              | <i>T</i> (80 °C), <i>t</i> (2.0 h), pH (1.0)              |
| <i>T</i> (80 °C), <i>t</i> (1.0 h), pH (1.5) <sup>c</sup> | <i>T</i> (70 °C), <i>t</i> (1.5 h), pH (1.5) <sup>c</sup> | <i>T</i> (90 °C), <i>t</i> (2.0 h), pH (1.5) <sup>c</sup> |
| <i>T</i> (90 °C), <i>t</i> (1.0 h), pH (2.0)              | <i>T</i> (80 °C), <i>t</i> (1.5 h), pH (2.0)              | <i>T</i> (70 °C), <i>t</i> (2.0 h), pH (2.0)              |

<sup>a</sup> In this experimental group, the three reaction solutions were fixed as follows: solution A ({As<sub>2</sub>W<sub>19</sub>} 1.0 mmol), solution B ({Ln<sup>3+</sup>+Pro} 1.0 mmol), solution C ({NaCl aq.} 1 M).

<sup>b</sup> *T* = temperature, *t* = time, pH means the final pH of the reaction system.

<sup>c</sup> The experimental groups with blue background represent the isolation of crystalline compounds **1-3**.

**Table S1b** Orthogonal experiments for optimizing the components in three solutions<sup>a,b</sup>

|                                      |                                                 |                                      |
|--------------------------------------|-------------------------------------------------|--------------------------------------|
| A (1.0 mmol), B (1.0 mmol), C (1.0M) | A (2.0 mmol), B (1.5 mmol), C (1.0M)            | A (1.5 mmol), B (2.0 mmol), C (1.0M) |
| A (1.5 mmol), B (1.0 mmol), C (2.0M) | A (1.0 mmol), B (1.5 mmol), (2.0M) <sup>c</sup> | A (2.0 mmol), B (2.0 mmol), C (2.0M) |
| A (2.0 mmol), B (1.0 mmol), C (3.0M) | A (1.5 mmol), B (1.5 mmol), C (3.0M)            | A (1.0 mmol), B (2.0 mmol), C (3.0M) |

<sup>a</sup> In this experimental group, the reaction solutions were fixed as follows: *T* = 80 °C, *t* = 1.5 h, pH = 1.5.

<sup>b</sup> **A** = {As<sub>2</sub>W<sub>19</sub>} in 10 mL aqueous solution A (pH = 1.5); **B** = {Ln<sup>3+</sup>+Pro} in 5 mL aqueous solution B; **C** = {NaCl aq.} in 10 mL aqueous solution C.

<sup>c</sup> The experimental groups with blue background exhibits the best yield for crystalline compounds **1-3**.

## 2. Additional structural figures for compounds 1 - 3

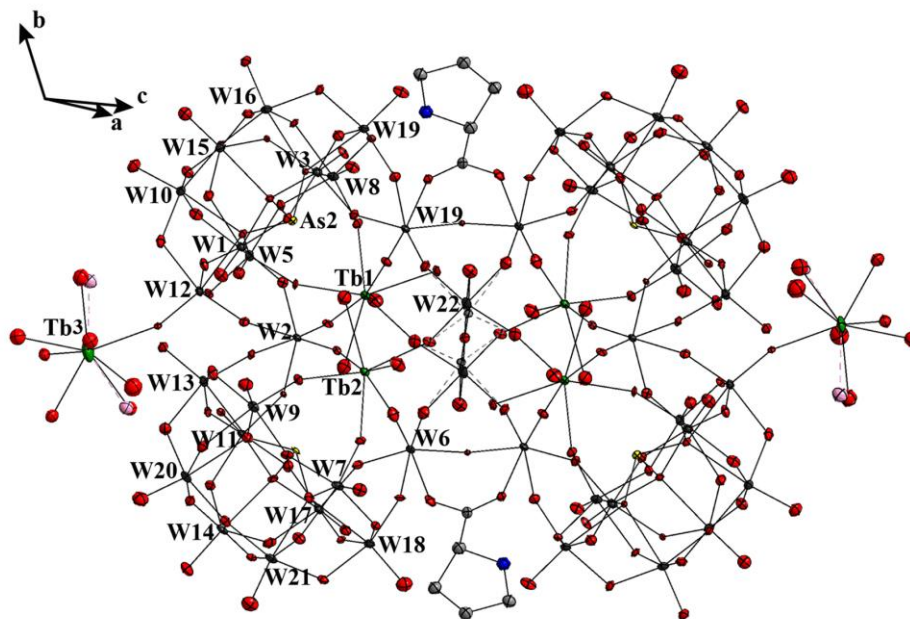

**Fig. S1** ORTEP diagram of the basic structural unit in **1** with thermal ellipsoids at 30% probability. Hydrogen atoms, Na cations and crystalline water molecules are omitted for clarity. The disordered oxygen atoms in the polyoxoanion are shown with pink color and broken lines and the disordered W atoms and W-O bonds are shown with grey color and broken lines, respectively.

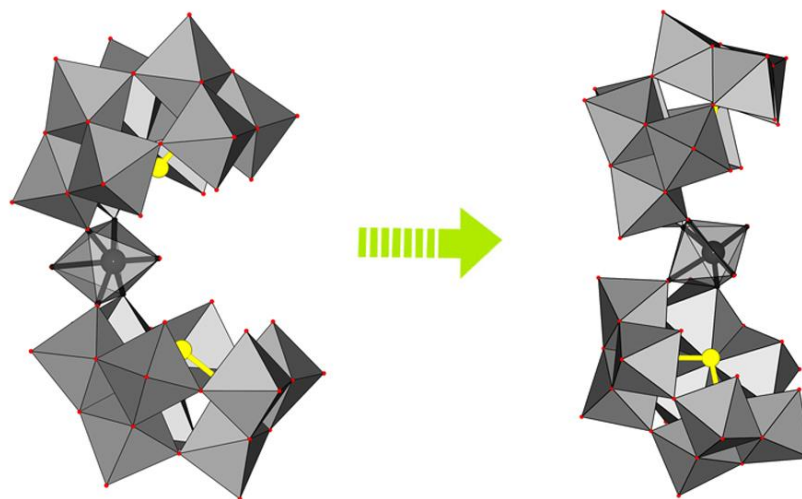

**Fig. S2** Structural comparison of the  $\{\text{As}_2\text{W}_{19}\text{O}_{67}(\text{H}_2\text{O})\}$  precursor (left) and the  $\{\text{As}_2\text{W}_{19}\text{O}_{68}\}$  building block in compound **1** (right).

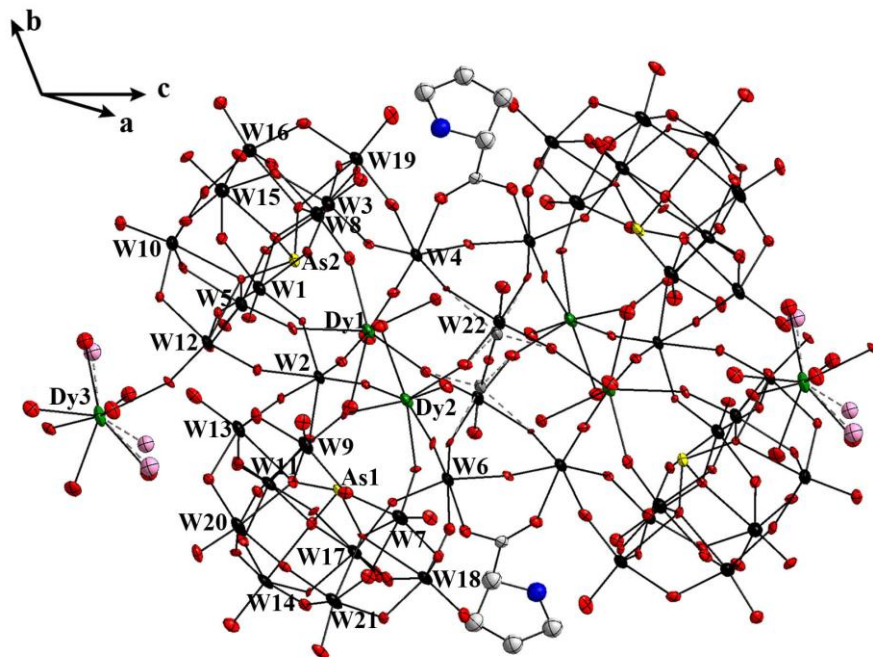

**Fig. S3** ORTEP diagram of the basic structural unit in **2** with thermal ellipsoids at 30% probability. Hydrogen atoms, Na cations and crystalline water molecules are omitted for clarity. The disordered oxygen atoms in the polyoxoanion are shown with pink color and broken lines and the disordered W atoms and W-O bonds are shown with grey color and broken lines, respectively.

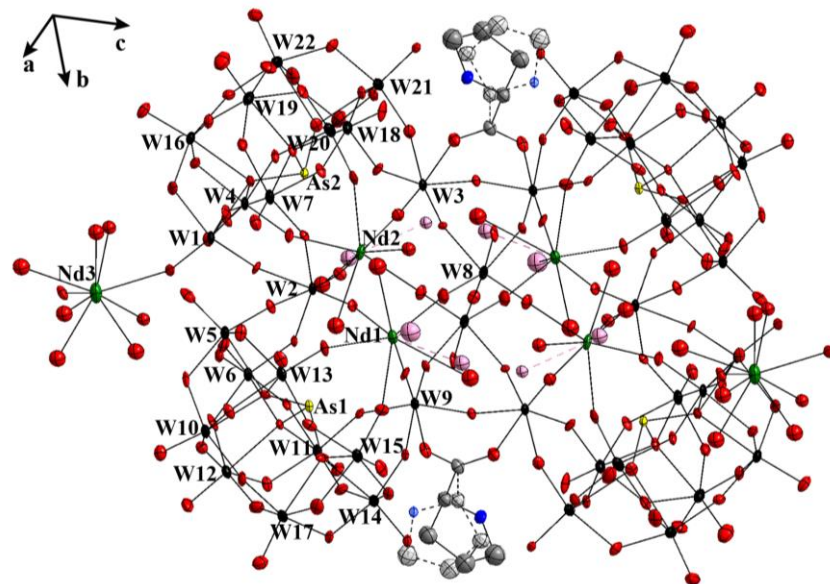

**Fig. S4** ORTEP diagram of the basic structural unit in **3** with thermal ellipsoids at 30% probability. Hydrogen atoms, Na cations and crystalline water molecules are omitted for clarity. The disordered oxygen atoms in the polyoxoanion are shown with pink color and broken lines and the disordered W atoms and W-O bonds are shown with grey color and broken lines, respectively.

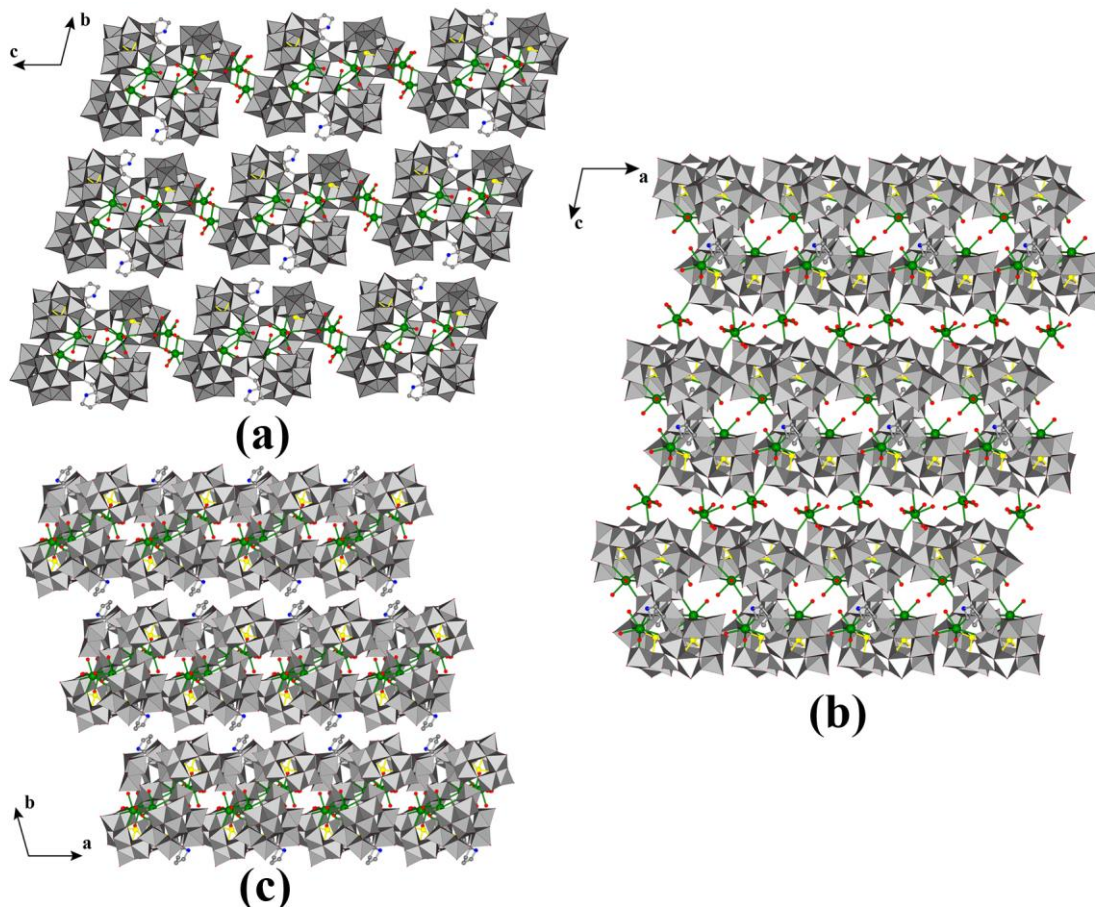

**Fig. S5** (a) 3-D packing arrangement of **1** viewed along the *a* axis; (b) 3-D packing arrangement of **1** viewed along the *b* axis. (c) 3-D packing arrangement of **1** viewed along the *c* axis. The polyoxoanions are represented with polyhedra; Na ions and solvent water molecules are omitted for clarity.

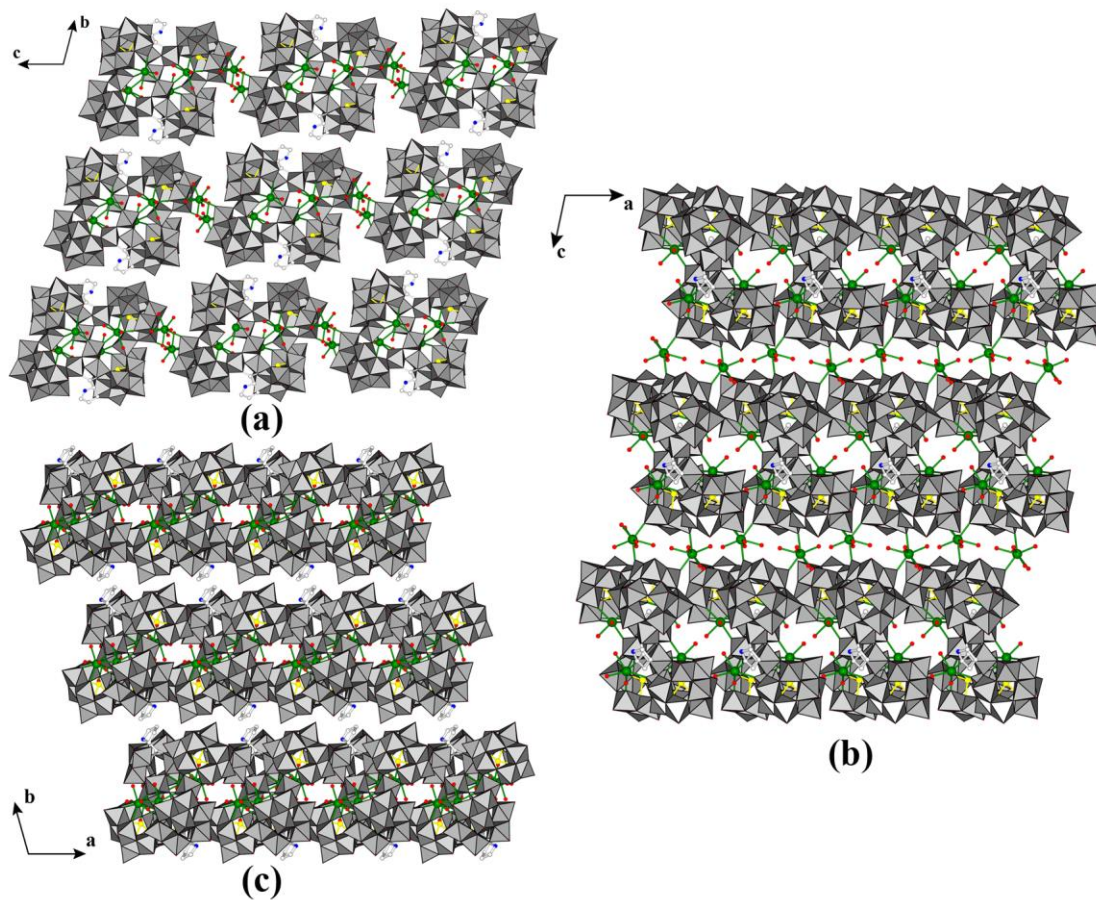

**Fig. S6** (a) 3-D packing arrangement of **2** viewed along the *a* axis. (b) 3-D packing arrangement of **2** viewed along the *b* axis. (c) 3-D packing arrangement of **2** viewed along the *c* axis. The polyoxoanions are represented with polyhedra; Na ions and solvent water molecules are omitted for clarity.

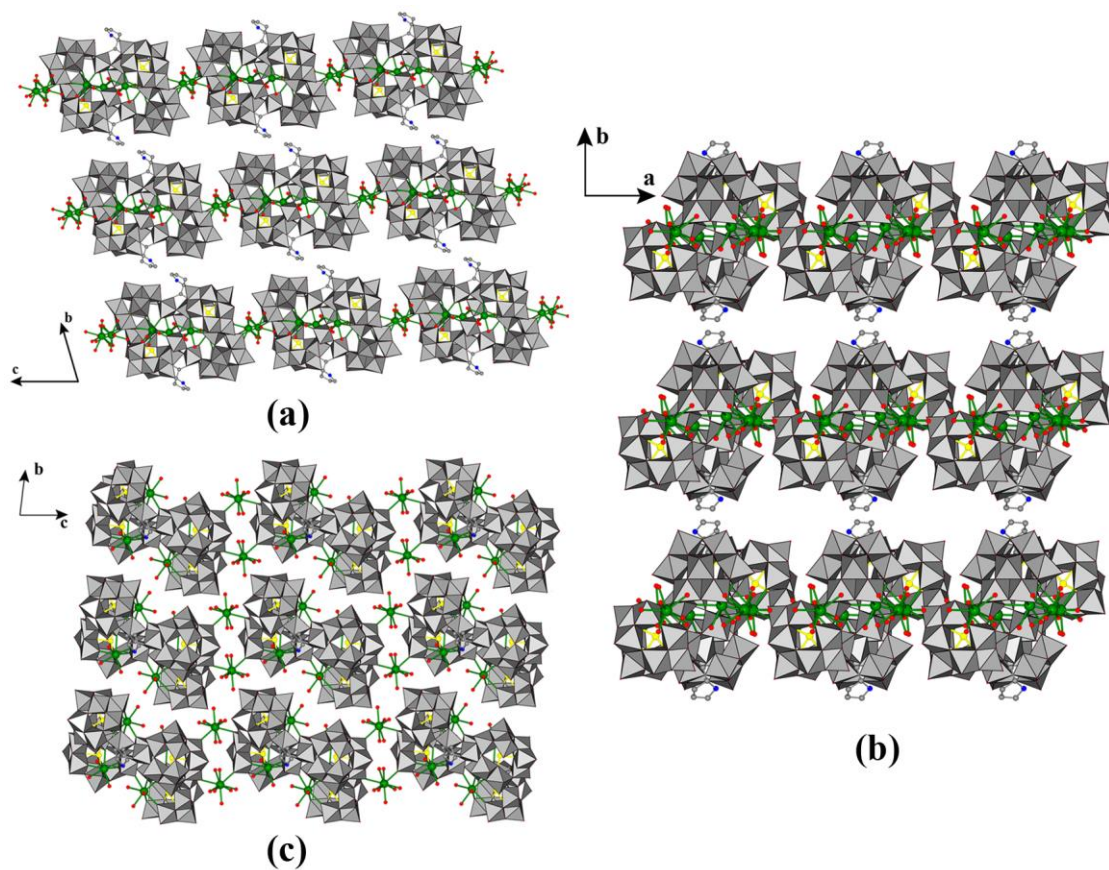

**Fig. S7** (a) 3-D packing arrangement of **3** viewed along the *a* axis. (b) 3-D packing arrangement of **3** viewed along the *b* axis. (c) 3-D packing arrangement of **3** viewed along the *c* axis. The polyoxoanions are represented with polyhedra; Na ions and solvent water molecules are omitted for clarity.

### 3. Selected bond lengths and angles for compounds 1-3

**Table S2** Selected bond lengths (Å) and angles (°) of compound **1**

|                     |           |                     |           |                     |           |
|---------------------|-----------|---------------------|-----------|---------------------|-----------|
| Tb(1)-O(53)         | 2.31(2)   | Tb(1)-O(75)         | 2.35(2)   | Tb(1)-O(2W)         | 2.44(3)   |
| Tb(1)-O(50)#1       | 2.34(2)   | Tb(1)-O(41)         | 2.35(2)   | Tb(1)-O(1W)         | 2.46(3)   |
| Tb(1)-O(40)         | 2.34(2)   | Tb(1)-O(3W)         | 2.44(2)   | Tb(2)-O(4W)         | 2.45(3)   |
| Tb(2)-O(66)         | 2.25(2)   | Tb(2)-O(12)         | 2.32(2)   | Tb(2)-O(30)#1       | 2.30(3)   |
| Tb(2)-O(1)          | 2.27(2)   | Tb(2)-O(5W)         | 2.36(3)   | Tb(2)-O(15)         | 2.39(3)   |
| Tb(3)-O(12W)        | 2.26(9)   | Tb(3)-O(7W)         | 2.35(5)   | Tb(3)-O(9W)         | 2.39(4)   |
| Tb(3)-O(10W)        | 2.35(8)   | Tb(3)-O(2)          | 2.37(3)   | Tb(3)-O(11W)        | 2.53(10)  |
| Tb(3)-O(8W)         | 2.36(4)   | Tb(3)-O(4)#3        | 2.42(2)   |                     |           |
| W(6)-O(66)          | 1.76(2)   | W(6)-O(47)          | 1.88(2)   | W(6)-O(8)           | 2.01(2)   |
| W(6)-O(6)           | 1.79(3)   | W(6)-O(19)          | 1.90(3)   | W(6)-O(79)          | 2.22(2)   |
| W(19)-O(72)         | 1.68(3)   | W(19)-O(38)         | 1.91(2)   | W(19)-O(62)         | 1.960(19) |
| W(19)-O(57)#1       | 1.84(2)   | W(19)-O(58)         | 1.92(2)   | W(19)-O(61)         | 2.41(2)   |
| W(22)-O(74)         | 1.74(3)   | W(22)-O(53)         | 1.83(2)   | W(22)-O(6)          | 2.08(3)   |
| W(22)-O(30)         | 1.76(3)   | W(22)-O(10)         | 2.01(2)   | W(22)-O(26)         | 2.349(5)  |
| O(53)-Tb(1)-O(40)   | 70.3(9)   | O(66)-Tb(2)-O(1)    | 73.9(8)   | O(12W)-Tb(3)-O(10W) | 148(4)    |
| O(53)-Tb(1)-O(50)#1 | 76.0(8)   | O(66)-Tb(2)-O(30)#1 | 74.7(9)   | O(12W)-Tb(3)-O(8W)  | 108(3)    |
| O(53)-Tb(1)-O(75)   | 139.9(9)  | O(66)-Tb(2)-O(12)   | 126.1(10) | O(12W)-Tb(3)-O(7W)  | 67(3)     |
| O(53)-Tb(1)-O(41)   | 148.2(10) | O(66)-Tb(2)-O(5W)   | 120.5(10) | O(12W)-Tb(3)-O(2)   | 98(3)     |
| O(53)-Tb(1)-O(3W)   | 104.9(8)  | O(66)-Tb(2)-O(15)   | 76.1(9)   | O(12W)-Tb(3)-O(11W) | 84(3)     |
| O(53)-Tb(1)-O(2W)   | 69.9(9)   | O(66)-Tb(2)-O(4W)   | 139.4(11) | O(12W)-Tb(3)-O(9W)  | 139(3)    |
| O(53)-Tb(1)-O(1W)   | 73.9(9)   |                     |           | O(12W)-Tb(3)-O(4)#3 | 77(3)     |
| O(66)-W(6)-O(6)     | 100.7(13) | O(72)-W(19)-O(57)#1 | 99.3(12)  | O(74)-W(22)-O(30)   | 102.2(13) |
| O(66)-W(6)-O(47)    | 97.8(11)  | O(72)-W(19)-O(38)   | 102.3(11) | O(74)-W(22)-O(53)   | 98.2(12)  |
| O(66)-W(6)-O(19)    | 100.9(11) | O(72)-W(19)-O(58)   | 97.0(12)  | O(74)-W(22)-O(6)    | 90.9(13)  |
| O(66)-W(6)-O(8)     | 89.0(12)  | O(72)-W(19)-O(62)   | 101.4(11) | O(74)-W(22)-O(10)   | 94.2(12)  |
| O(66)-W(6)-O(79)    | 171.8(12) | O(72)-W(19)-O(61)   | 169.0(10) | O(74)-W(22)-O(26)   | 170.9(11) |

Symmetry transformations used to generate equivalent atoms: #1 -x+1,-y,-z+2, #3 -x+1,-y,-z+1



**Table S3** Selected bond lengths (Å) and angles (°) of compound **2**

|                     |           |                    |           |                    |           |
|---------------------|-----------|--------------------|-----------|--------------------|-----------|
| Dy(1)-O(53)         | 2.265(17) | Dy(1)-O(41)        | 2.364(17) | Dy(1)-O(2W)        | 2.44(2)   |
| Dy(1)-O(50)#1       | 2.336(18) | Dy(1)-O(75)        | 2.38(2)   | Dy(1)-O(1W)        | 2.47(2)   |
| Dy(1)-O(40)         | 2.354(18) | Dy(1)-O(3W)        | 2.410(17) | Dy(2)-O(12)        | 2.333(18) |
| Dy(2)-O(1)          | 2.236(15) | Dy(2)-O(30)#1      | 2.25(2)   | Dy(2)-O(15)        | 2.367(18) |
| Dy(2)-O(66)         | 2.252(18) | Dy(2)-O(5W)        | 2.318(18) | Dy(2)-O(4W)        | 2.45(2)   |
| Dy(3)-O(8W)         | 2.29(2)   | Dy(3)-O(12W)       | 2.34(6)   | Dy(3)-O(7W)        | 2.41(3)   |
| Dy(3)-O(2)          | 2.326(18) | Dy(3)-O(4)#3       | 2.380(19) | Dy(3)-O(11W)       | 2.46(5)   |
| Dy(3)-O(10W)        | 2.33(5)   | Dy(3)-O(9W)        | 2.38(2)   |                    |           |
| W(4)-O(50)          | 1.72(2)   | W(4)-O(9)          | 1.828(16) | W(4)-O(57)         | 2.050(18) |
| W(4)-O(10)          | 1.786(14) | W(4)-O(47)         | 1.931(18) | W(4)-O(77)         | 2.240(19) |
| W(6)-O(66)          | 1.757(18) | W(6)-O(47)         | 1.869(17) | W(6)-O(8)          | 1.99(2)   |
| W(6)-O(6)           | 1.804(17) | W(6)-O(19)         | 1.89(2)   | W(6)-O(78)         | 2.203(19) |
| W(22)-O(74)         | 1.69(2)   | W(22)-O(30)        | 1.81(2)   | W(22)-O(10)        | 2.072(15) |
| W(22)-O(53)         | 1.786(18) | W(22)-O(6)         | 2.068(19) | W(22)-O(26)        | 2.393(4)  |
| O(53)-Dy(1)-O(50)#1 | 77.2(7)   | O(1)-Dy(2)-O(66)   | 75.2(6)   | O(8W)-Dy(3)-O(2)   | 146.7(8)  |
| O(53)-Dy(1)-O(40)   | 78.3(6)   | O(1)-Dy(2)-O(12)   | 92.1(6)   | O(8W)-Dy(3)-O(12W) | 96.5(15)  |
| O(53)-Dy(1)-O(41)   | 146.5(7)  | O(1)-Dy(2)-O(30)#1 | 92.8(7)   | O(8W)-Dy(3)-O(9W)  | 72.1(8)   |
| O(53)-Dy(1)-O(75)   | 141.6(7)  | O(1)-Dy(2)-O(15)   | 127.6(7)  | O(8W)-Dy(3)-O(10W) | 89.0(12)  |
| O(53)-Dy(1)-O(3W)   | 105.6(7)  | O(1)-Dy(2)-O(4W)   | 74.0(6)   | O(8W)-Dy(3)-O(11W) | 142.6(14) |
| O(53)-Dy(1)-O(2W)   | 70.6(7)   | O(1)-Dy(2)-O(5W)   | 156.1(7)  | O(8W)-Dy(3)-O(7W)  | 87.6(10)  |
| O(53)-Dy(1)-O(1W)   | 73.8(7)   |                    |           | O(8W)-Dy(3)-O(4)#3 | 74.5(8)   |
| O(50)-W(4)-O(10)    | 102.3(8)  | O(66)-W(6)-O(6)    | 100.9(9)  | O(74)-W(22)-O(30)  | 101.3(10) |
| O(50)-W(4)-O(9)     | 98.7(9)   | O(66)-W(6)-O(47)   | 98.4(8)   | O(74)-W(22)-O(10)  | 91.4(8)   |
| O(50)-W(4)-O(47)    | 97.6(8)   | O(66)-W(6)-O(19)   | 100.1(8)  | O(74)-W(22)-O(6)   | 92.7(9)   |
| O(50)-W(4)-O(57)    | 90.9(8)   | O(66)-W(6)-O(8)    | 90.5(9)   | O(74)-W(22)-O(26)  | 169.3(7)  |
| O(50)-W(4)-O(77)    | 171.5(7)  | O(66)-W(6)-O(78)   | 172.7(9)  | O(74)-W(22)-O(53)  | 102.7(9)  |

Symmetry transformations used to generate equivalent atoms: #1 -x+1,-y,-z+2; #3 -x+1,-y,-z+1

**Table S4** Selected bond lengths (Å) and angles (°) of compound **3**

|                     |           |                    |            |                      |           |
|---------------------|-----------|--------------------|------------|----------------------|-----------|
| Nd(1)-O(18)         | 2.403(17) | Nd(1)-O(2)         | 2.448(12)  | Nd(1)-O(5W)          | 2.84(4)   |
| Nd(1)-O(76)#1       | 2.431(14) | Nd(1)-O(3W)        | 2.46(3)    | Nd(1)-O(40)#1        | 2.462(13) |
| Nd(1)-O(46)         | 2.444(14) | Nd(2)-O(6)#1       | 2.390(14)  | Nd(2)-O(8W)          | 2.50(2)   |
| Nd(2)-O(29)         | 2.364(17) | Nd(2)-O(55)        | 2.457(13)  | Nd(2)-O(2W)          | 2.54(3)   |
| Nd(2)-O(7)          | 2.368(13) | Nd(2)-O(33)        | 2.469(14)  | Nd(2)-O(4W)          | 2.60(3)   |
| Nd(3)-O(10W)        | 2.446(16) | Nd(3)-O(6W)        | 2.484(18)  | Nd(3)-O(12W)         | 2.541(16) |
| Nd(3)-O(62)#2       | 2.455(15) | Nd(3)-O(1W)        | 2.524(16)  | Nd(3)-O(9W)          | 2.581(14) |
| Nd(3)-O(7W)         | 2.474(18) | Nd(3)-O(41)        | 2.531(15)  | Nd(3)-O(11W)         | 2.586(15) |
| W(3)-O(29)          | 1.761(17) | W(3)-O(58)         | 1.906(14)  | W(3)-O(45)           | 2.024(14) |
| W(3)-O(70)          | 1.807(14) | W(3)-O(74)         | 1.952(13)  | W(3)-O(77)           | 2.255(16) |
| W(8)-O(76)          | 1.746(14) | W(8)-O(73)         | 1.9213(12) | W(8)-O(60)           | 2.081(12) |
| W(8)-O(6)           | 1.746(14) | W(8)-O(70)         | 2.065(13)  | W(8)-O(14)           | 2.103(18) |
| W(9)-O(18)          | 1.719(17) | W(9)-O(74)         | 1.884(13)  | W(9)-O(21)           | 2.004(14) |
| W(9)-O(60)          | 1.805(12) | W(9)-O(28)         | 1.911(14)  | W(9)-O(78)           | 2.203(15) |
| O(18)-Nd(1)-O(76)#1 | 73.9(6)   | O(55)-Nd(2)-O(4W)  | 118.9(7)   | O(12W)-Nd(3)-O(9W)   | 84.3(5)   |
| O(18)-Nd(1)-O(46)   | 75.4(5)   | O(55)-Nd(2)-O(33)  | 115.9(5)   | O(12W)-Nd(3)-O(11W)  | 133.2(5)  |
| O(18)-Nd(1)-O(2)    | 115.5(5)  | O(55)-Nd(2)-O(8W)  | 67.7(6)    | O(10W)-Nd(3)-O(12W)  | 138.1(5)  |
| O(18)-Nd(1)-O(40)#1 | 69.5(5)   | O(55)-Nd(2)-O(2W)  | 155.1(7)   | O(62)#2-Nd(3)-O(12W) | 66.7(5)   |
| O(18)-Nd(1)-O(13W)  | 140.1(7)  | O(6)#1-Nd(2)-O(55) | 82.7(5)    | O(7W)-Nd(3)-O(12W)   | 79.2(6)   |
| O(18)-Nd(1)-O(5W)   | 66.1(10)  | O(29)-Nd(2)-O(55)  | 69.3(5)    | O(6W)-Nd(3)-O(12W)   | 74.4(6)   |
| O(18)-Nd(1)-O(3W)   | 140.4(7)  | O(7)-Nd(2)-O(55)   | 82.0(5)    | O(1W)-Nd(3)-O(12W)   | 71.9(5)   |
|                     |           |                    |            | O(41)-Nd(3)-O(12W)   | 142.2(6)  |
| O(29)-W(3)-O(70)    | 100.1(7)  | O(76)-W(8)-O(6)    | 103.0(7)   | O(18)-W(9)-O(60)     | 103.0(7)  |
| O(29)-W(3)-O(58)    | 102.2(7)  | O(76)-W(8)-O(73)   | 99.4(6)    | O(18)-W(9)-O(74)     | 97.9(6)   |
| O(29)-W(3)-O(45)    | 92.0(7)   | O(76)-W(8)-O(70)   | 88.1(6)    | O(18)-W(9)-O(28)     | 100.5(7)  |
| O(29)-W(3)-O(77)    | 173.0(6)  | O(76)-W(8)-O(60)   | 162.1(7)   | O(18)-W(9)-O(21)     | 90.0(7)   |
| O(29)-W(3)-O(74)    | 96.3(6)   | O(76)-W(8)-O(14)   | 88.6(7)    | O(18)-W(9)-O(78)     | 171.8(6)  |

Symmetry transformations used to generate equivalent atoms: #1  $-x+1, -y, -z+2$ ; #2  $-x+1, -y, -z+1$

## 4. Additional physical measurements for compounds 1-3

### 4.1 IR spectra of compound 1-3

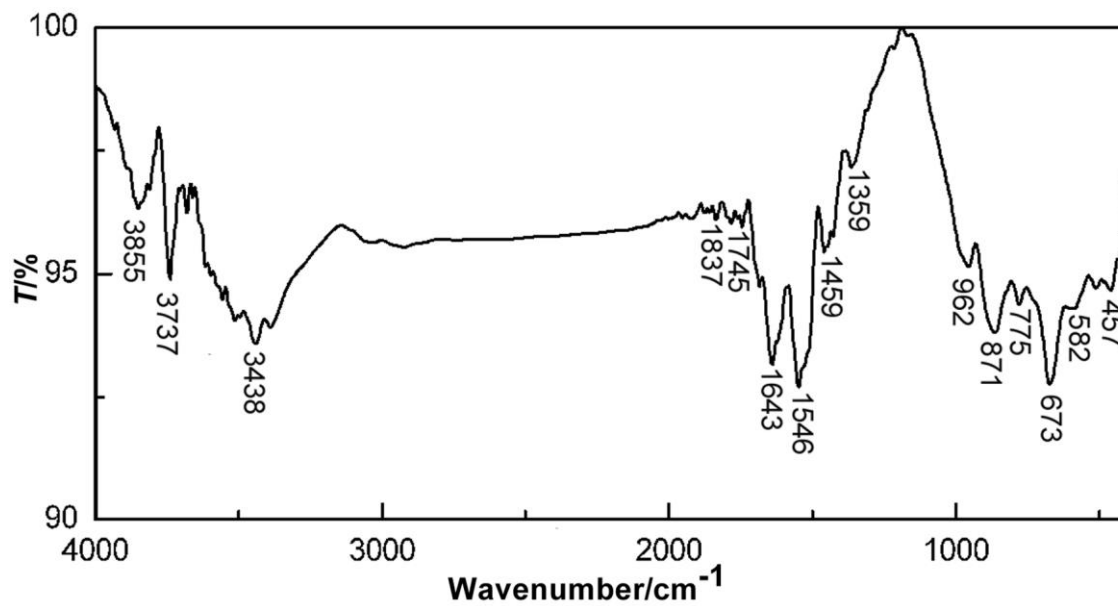

Fig. S8 FT-IR spectrum of compound 1 measured at room temperature

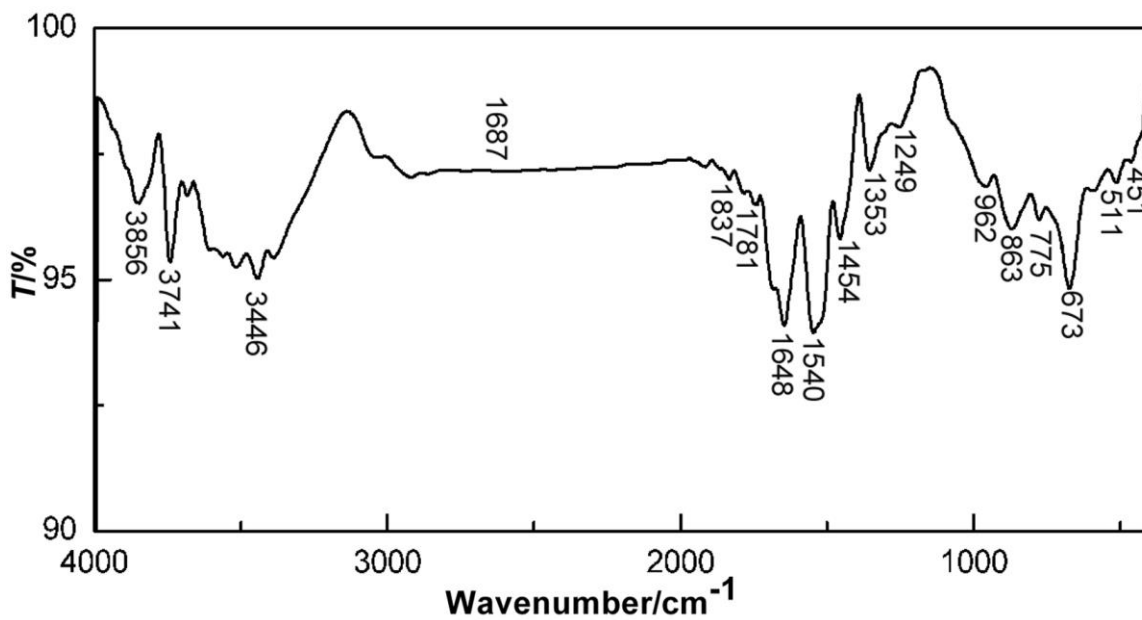

Fig. S9 FT-IR spectrum of compound 2 measured at room temperature

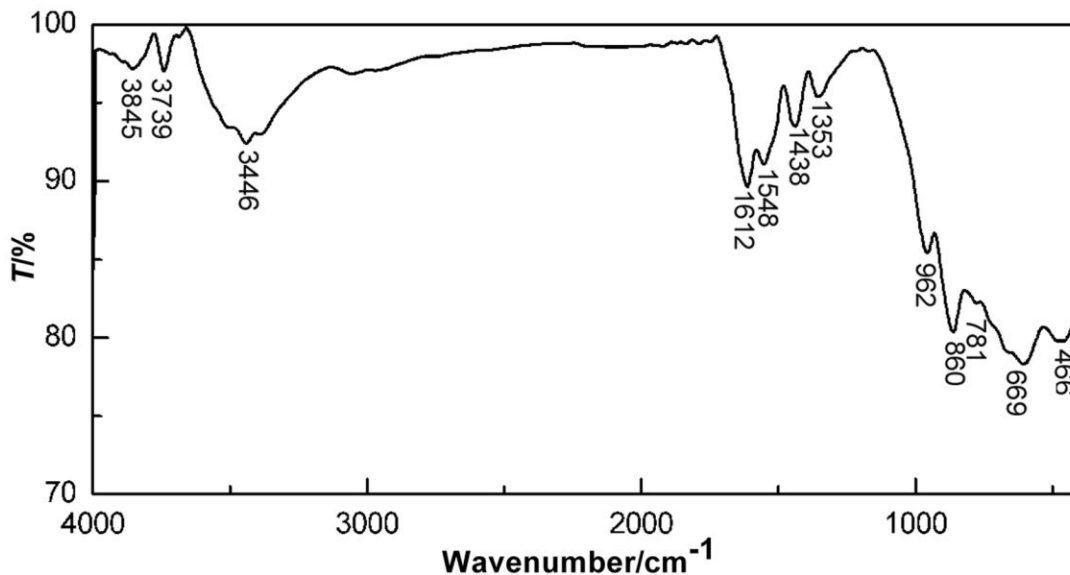

**Fig. S10** FT-IR spectrum of compound **3** measured at room temperature

### IR spectra

In the IR spectrum of compounds **1-3** (Fig. S8-S10), four characteristic peaks in the range of 1000-700 cm<sup>-1</sup> are ascribed to the vibrations of  $\nu(\text{As-O})$ ,  $\nu(\text{W=O}_t)$  and  $\nu(\text{W-O}_{b/c}-\text{W})$  of POM clusters, respectively. The strong and broad peak near 3440 cm<sup>-1</sup> is attributed to extending vibrations of crystalline lattice water molecules. The strong peaks close to 3850 cm<sup>-1</sup> and 1640 cm<sup>-1</sup> are attributed to the  $\nu(\text{C=O})$  vibration of proline ligands. The peaks close to 3740 cm<sup>-1</sup> and 1545 cm<sup>-1</sup> correspond to the vibration of the  $\text{NH}_2^+$  group, and the peak near 1355 cm<sup>-1</sup> corresponds to  $\nu(\text{C-N})$  of proline ligands.

## 4.2 TG analysis of compounds 1-3

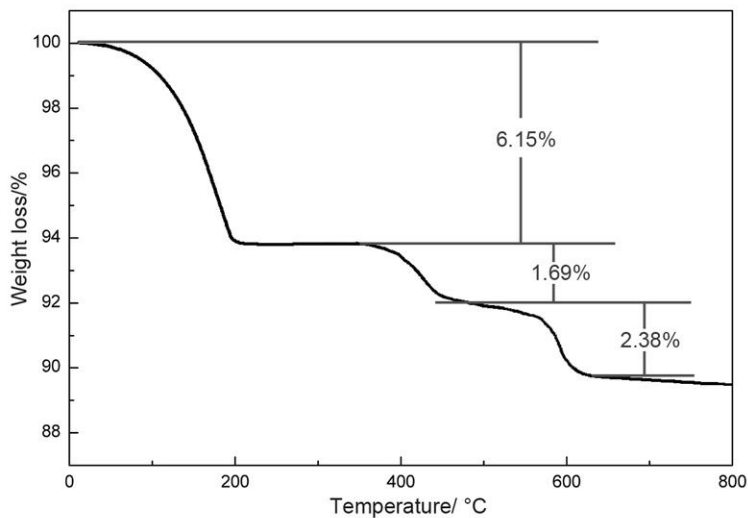

**Fig. S11** TG curve for compound 1

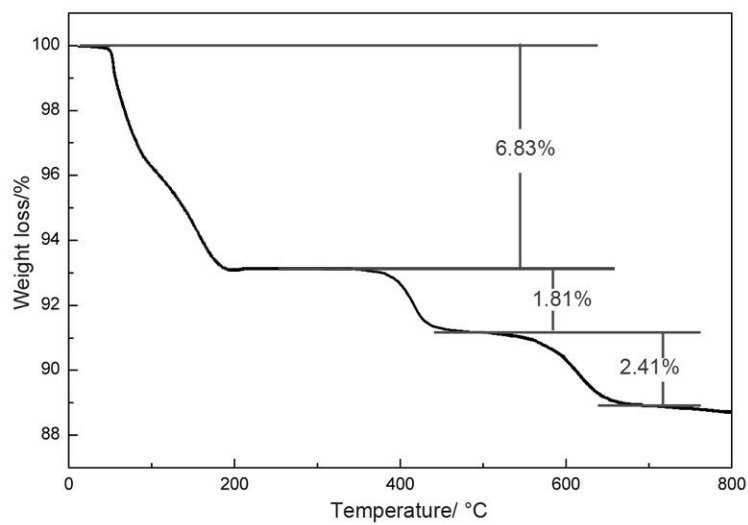

**Fig. S12** TG curve for compound 2

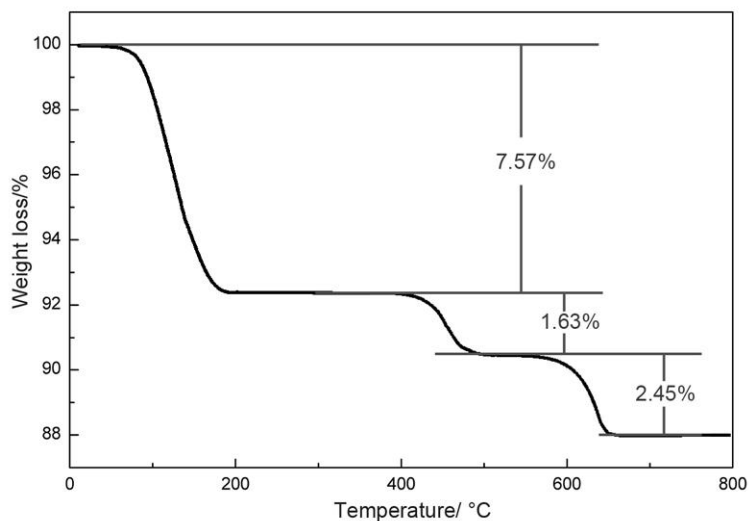

**Fig. S13** TG curve for compound **3**

### TG analysis

The TG curve of **1** shows a total weight loss of 10.22 % in the range of 44-617 °C, in agreement with the calculated value of 10.36 %. The weight loss of 6.15% at 44-207 °C corresponds to the loss of all crystalline and coordinated water molecules (calc. 6.07%). The weight loss of 1.77% at 375-435 °C is attributed to the decomposition and loss of proline ligands. The weight loss of 2.38% occurs between 440–600 °C, probably due to the loss of partial arsenic oxide and composition water molecules (calc. 2.53%).

The TG curve of **2** gives a total weight loss of 11.05 % in the range of 52-671 °C, which agrees with the calculated value of 10.72%. The weight loss of 6.83 % at 52-194 °C corresponds to the loss of all crystalline and coordinated water molecules (calc. 6.45%). The weight loss of 1.81% at 385-461 °C is attributed to the decomposition and loss of proline ligands. The weight loss of 2.41% occurs between 538–673 °C, probably due to the loss of partial arsenic oxide and composition water molecules (calc. 2.52%).

The TG curve of **3** shows a total weight loss of 11.65 % in the range of 53-642 °C, in agreement with the calculated value of 12.04%. The weight loss of 7.57% at 53-195 °C corresponds to the loss of all crystalline and coordinated water molecules (calc. 7.78%). The weight loss of 1.63% at 419-495 °C is attributed to the decomposition and loss of proline ligands. The weight loss of 2.45% occurs between 565–639 °C, probably due to the loss of partial arsenic oxide and composition water molecules (calc. 2.52%).

### 4.3 Photoluminescent properties of compound **3**

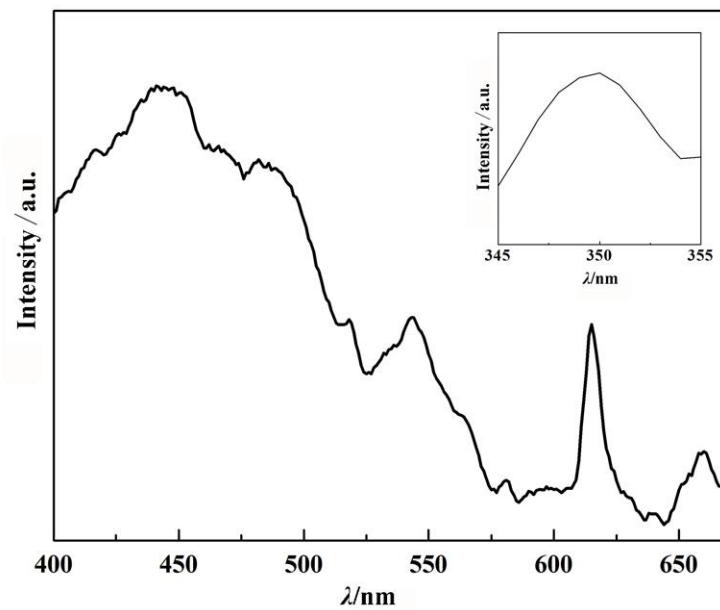

**Fig. S14** The luminescence spectrum of Nd(III) in compound **3** excited at 350 nm.

#### 4.4 Powder X-ray diffractions of compounds 1-3

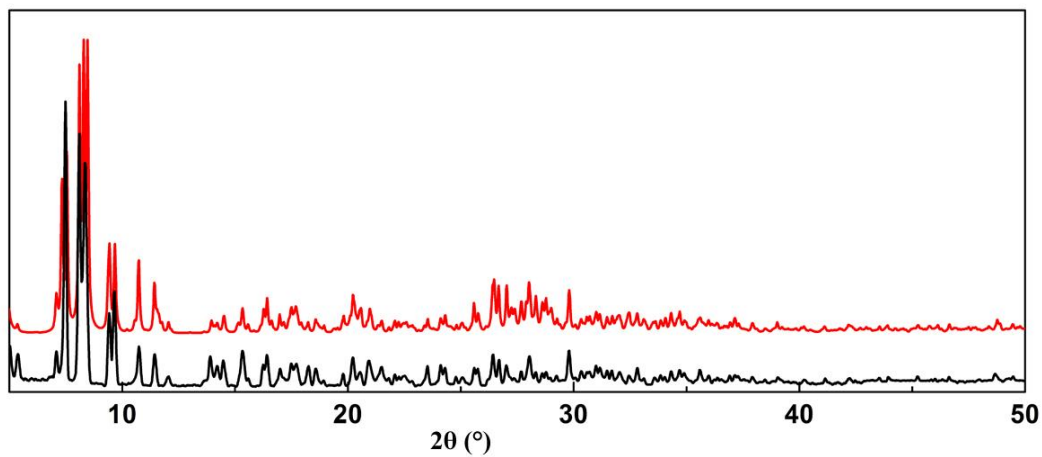

**Fig. S15** Experimental powder X-ray diffraction pattern of **1** (black) and simulated PXRD pattern (from the single-crystal X-ray diffraction data) of **1** (red).

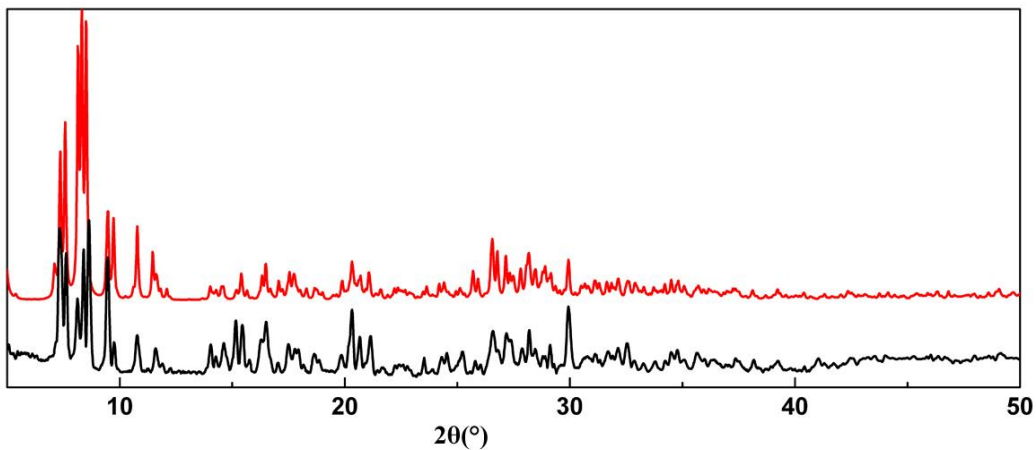

**Fig. S16** Experimental powder X-ray diffraction pattern of **2** (black) and simulated PXRD pattern (from the single-crystal X-ray diffraction data) of **2** (red).



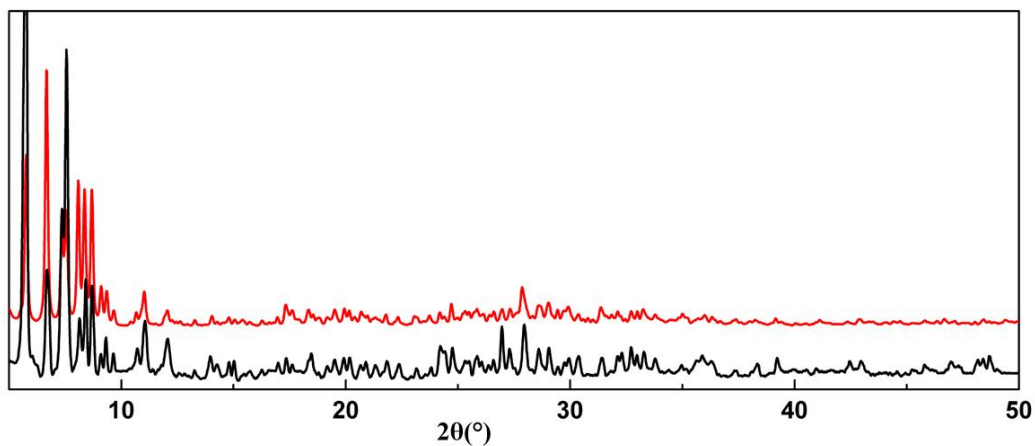

**Fig. S17** Experimental powder X-ray diffraction pattern of **3** (black) and simulated PXRD pattern (from the single-crystal X-ray diffraction data) of **3** (red).

**Discussion:** Powder X-ray diffraction pattern of all compounds have been collected to confirm the phase purity of the bulk compounds (Figure S15-S17).
